# Supplementary material for: A Circulating Exosome RNA Signature Is a Potential Diagnostic Marker for Pancreatic Cancer, a Systematic Study
Source: MDPI journal article supplement (doi:10.3390/cancers13112565), 2021-05-24
Supplement: s1 [file s1]

# A Circulating Exosome RNA Signature is a Potential Diagnostic Marker for Pancreatic Cancer, a Systematic Study

Yixing Wu, Hongmei Zeng, Qing Yu, Huatian Huang, Beatrice Fervers, Zhesheng Chen and Lingeng Lu

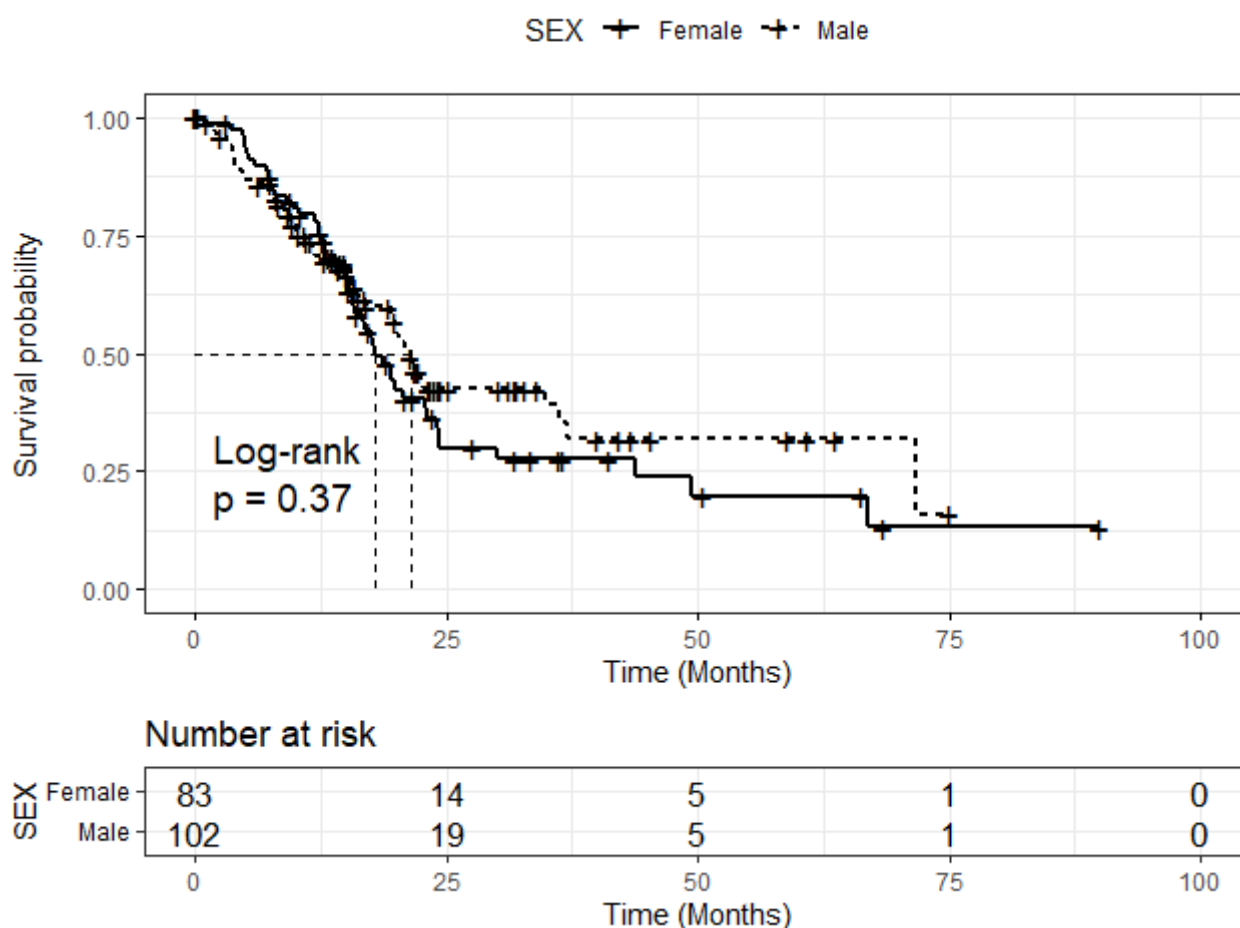

**Figure S1.** Kaplan-Meier overall survival curves stratified by sex in pancreatic cancer. Male patients showed a superior overall survival in comparison to female patients. The median survivals were 21.4 (95% CI: 19.4–37.1) months for men and 17.9 (95% CI: 15.8–24.1) months for women, respectively. On average, male patients survived approximately 3.5 months longer than female patients. However, the difference was not statistically significant (log-rank  $p$  value = 0.37).
